# Supplementary material for: Targeting the Crosstalk of Immune Response and Vascular Smooth Muscle Cells Phenotype Switch for Arteriovenous Fistula Maturation
Source: MDPI journal article supplement (doi:10.3390/ijms231912012), 2022-10-10
Supplement: s1 [file s1]

# Targeting the Crosstalk of Immune Response and Vascular Smooth Muscle Cells Phenotype Switch for Arteriovenous Fistula Maturation

Vikrant Rai, Harbinder Singh, and Devendra K. Agrawal \*

Figure S1. RT-qPCR for VACM1, CD11b, and CD68 in VSMCs isolated from control and arteries with plaque. Vascular smooth muscle cell (VSMC), control (C), Vascular Cell Adhesion Molecule (VCAM) 1, cluster of differentiation (CD). All data are presented as mean  $\pm$  standard deviation (SD).  $p < 0.05$  is considered statistically significant. \*\*\*\* $p < 0.0001$ .

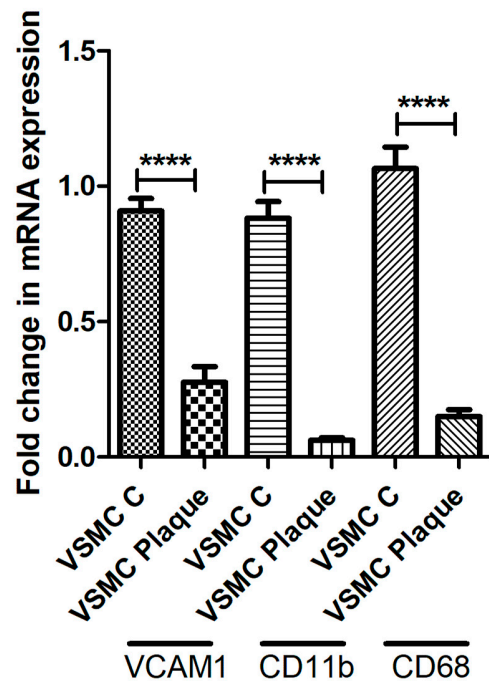

Figure S2. RT-qPCR for the effects of pro-inflammatory cytokines IL-6, IL-1 $\beta$ , and TNF- $\alpha$  on VSMCs phenotype markers. Panel A-RTPCR for  $\alpha$ -SMA, TAGLN, and Myh11; panel B- RT-PCR for CK-18, S100A4, CALM2, and ICAM1; and panel C- RT-PCR for KLF4 and CD68. Alpha-smooth muscle actin ( $\alpha$ -SMA), transgelin (TAGLN), Myosin Heavy Chain 11 smooth muscle (Myh11), cytokeratin (CK)-18, S100 protein A4 (S100A4), calmodulin 2 (CALM2), Intercellular Adhesion Molecule (ICAM)1, Krüppel-like factor 4 (KLF4).  $\alpha$ -SMA, TAGLN, and Myh11 (markers for contractile vascular smooth muscle cells (VSMCs)); CK-18, S100A4, CALM2, and ICAM1 (markers for proliferative VSMCs); and KLF4 (a marker for de-differentiated VSMCs). All data are presented as mean  $\pm$  standard deviation (SD).  $p < 0.05$  is considered statistically significant. \* $p < 0.05$ , \*\* $p < 0.01$ , \*\*\* $p < 0.001$  and \*\*\*\* $p < 0.0001$ .

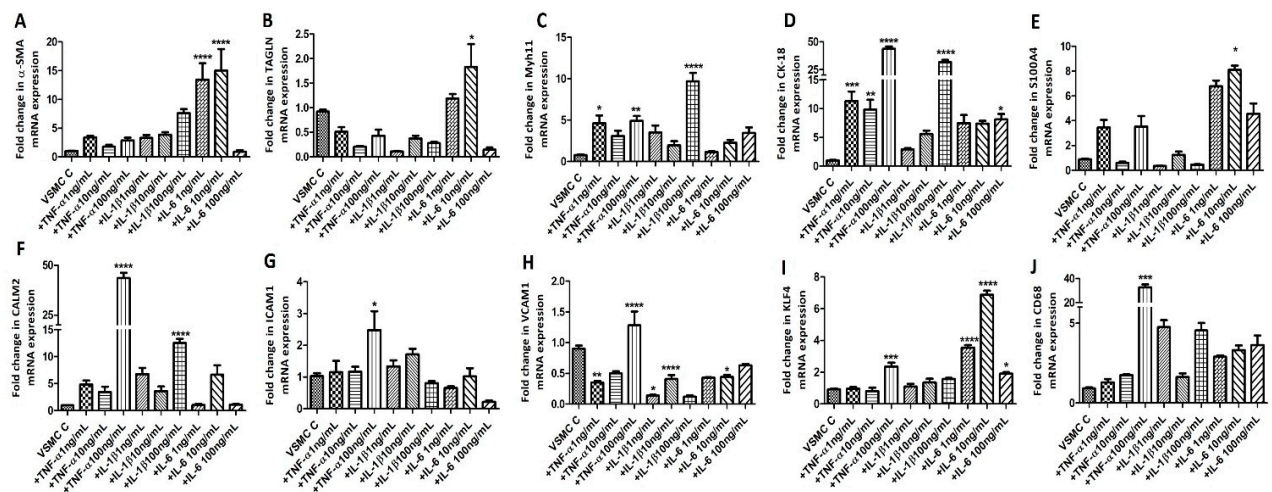

Figure S3. Control artery (panel A) and artery with plaques (panel B) collected after euthanasia. Red circle shows plaque formation and green circle shows adjacent normal artery.

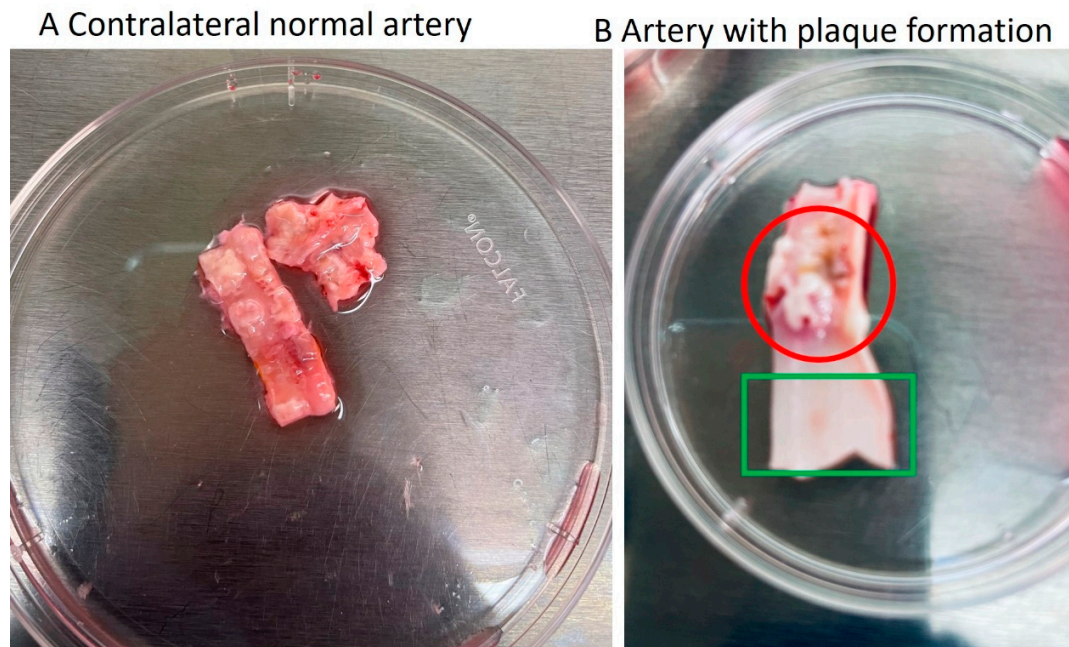

Figure S4. Negative immunofluorescence staining for all antibodies. Alexa Fluor 488 (panel A), Alexa Fluor 596 (panel B), CD68 (panel C), interleukin (IL)-6 (panel D), IL-8 (panel E), tumor necrosis factor (TNF)- $\alpha$  (panel F),  $\alpha$ -smooth muscle actin (SMA) (panel G), and IL-1 $\beta$  (panel H).

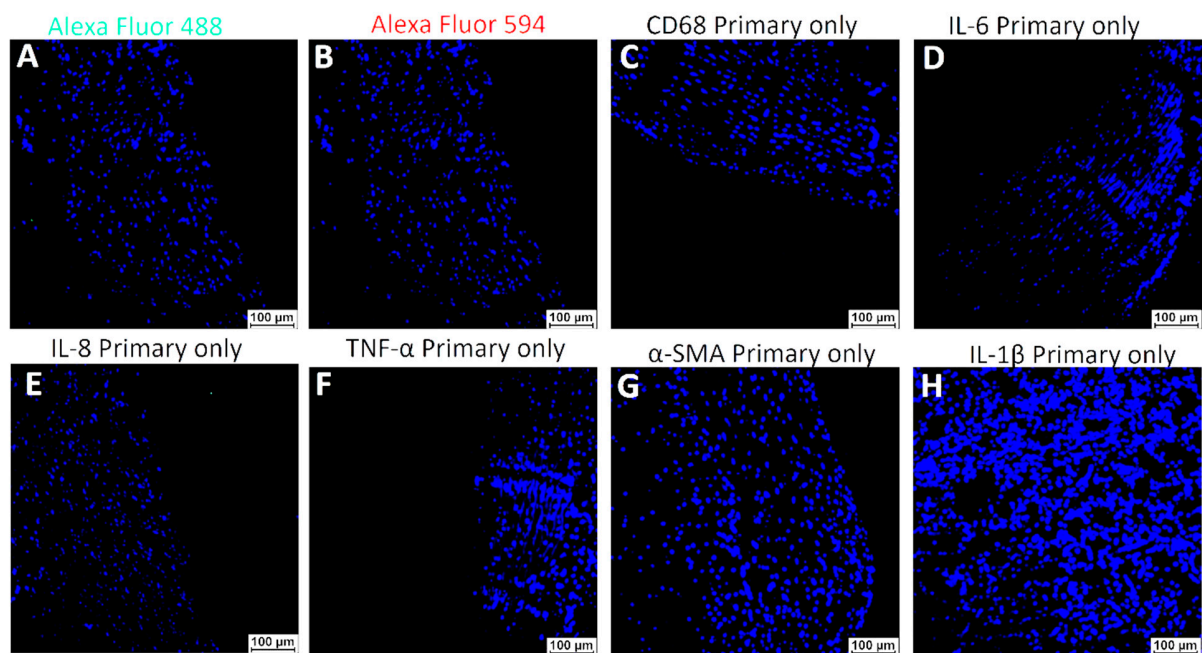

Table S1. Forward and reverse nucleotide sequence of the genes used in RT-PCR. Transgelin (Tagln), myosin heavy chain 11 (Myh11), cytokeratin (CK)-18, S100 protein A4 (S100A4), calmodulin 2 (CALM2), Intercellular Adhesion Molecule (ICAM)1, Krüppel-like factor 4 (KLF4), interleukin (IL), tumor necrosis factor (TNF)- $\alpha$ .  $\alpha$ -SMA, TAGLN, and Myh11 (markers for contractile vascular smooth muscle cells (VSMCs)); CK-18, S100A4, CALM2, and ICAM1 (markers for proliferative VSMCs); and KLF4 (a marker for de-differentiated VSMCs), 18S was used as housekeeping gene.

| Gene Name     |         | Nucleotide sequence (5'-3') |
|---------------|---------|-----------------------------|
| Tagln         | Forward | GGCGATCCCAACTGGTTTAT        |
| Tagln         | Reverse | CAGGCCAATGACATGCTTTC        |
| Myh11         | Forward | AGTTGGAGATCTGGGACCGA        |
| Myh11         | Reverse | TAATGCTGGCTGCCTCGAAA        |
| CK-18         | Forward | GGCTCCGCAAGGTCATTGAT        |
| CK-18         | Reverse | CAACTCCACGGTCAACCCAG        |
| S100A4        | Forward | GTGTCCACCTTCCACAAGTA        |
| S100A4        | Reverse | CGGGTCAGCAACTCCTTTA         |
| CALM2         | Forward | GACTCCACCAGCCCTTCAAC        |
| CALM 2        | Reverse | TAAAGGGAAGGGGCGAACAG        |
| ICAM-1        | Forward | CAACCCCCAAGCTGATCTGT        |
| ICAM-1        | Reverse | GTGCCTGTAATCTCCCGCTT        |
| VCAM-1        | Forward | GCGAGTCCTCCCTGTCTTTC        |
| VCAM-1        | Reverse | CGTGGATCTGGTCCCGTTAG        |
| KLF4          | Forward | GAGGAGCCAAAGCCAAAGA         |
| KLF4          | Reverse | GGTGTGCCTTGAGATGAGAA        |
| CD68          | Forward | TCCCAGTGACCAAACCATCC        |
| CD68          | Reverse | TTGGAACAGATGCTCACGGA        |
| CD11b         | Forward | CAACTTCTCTCTGGTGGGAAAG      |
| CD11b         | Reverse | GGGAAACAAGGCTGTGAAGA        |
| TNF- $\alpha$ | Forward | 5'-CATCTACCTGGGAGGGGTCT-3'  |
| TNF- $\alpha$ | Reverse | 5'-CCAGATAGTCGGGCAGGTTG-3'  |
| IL-6          | Forward | 5'-TGCAGTCACAGAACGAGTGG-3'  |
| IL-6          | Reverse | 5'-CAGGTGCCCCAGCTACATTAT-3' |
| IL-8          | Forward | 5'-GACCCCAAGGAAAAGTGGGT-3'  |
| IL-8          | Reverse | 5'-TGACCAGCACAGGAATGAGG-3'  |
| 18S           | Forward | 5'-CCCACGGAATCGAGAAAGAG-3'  |
| 18S           | Reverse | 5'-TTGACGGAAGGGCACCA-3'     |

Table S2. Antibodies and dilution used for dual immunofluorescence and Western Blot. Interleukin (IL), tumor necrosis factor (TNF)- $\alpha$ , alpha-smooth muscle actin ( $\alpha$ -SMA), Krüppel-like factor 4 (KLF4).

| <b>Antibody</b> | <b>Catalog no</b> | <b>Dilution</b> |
|-----------------|-------------------|-----------------|
| CD68            | ab955             | 1:200           |
| CD68            | ab125212          | 1:100           |
| IL-6            | ab6672            | 1:100           |
| TNF- $\alpha$   | ab6671            | 1:200           |
| IL-1 $\beta$    | ab9722            | 1:100           |
| $\alpha$ -SMA   | ab5694            | 1:100           |
| $\alpha$ -SMA   | ab7817            | 1:100           |
| IL-2            | sc-133118         | 1:50            |
| KLF4            | NBP2-17070        | 1:1000          |
| CK-18           | MA1-06326         | 1:500           |
| B-actin         | ab8226            | 1:2000          |
| S100A4          | ab197896          | 1:1000          |
